# Supplementary material
Source: Springer Nature journal article supplement (https://www.springermedizin.de/resource/supplementary/12985_2006_198_MOESM2_ESM.pdf/9607474)

**PERV-A env**

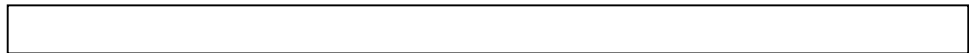

**PERV-C env**

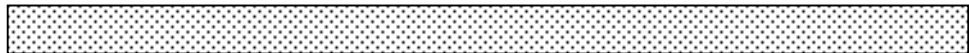

**PERV-AC env (13910 and 15149)**

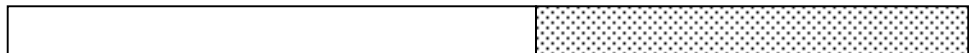

**PERV-AC env (13653 and 15150)**

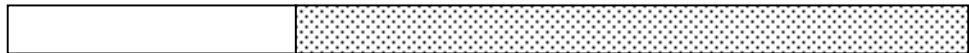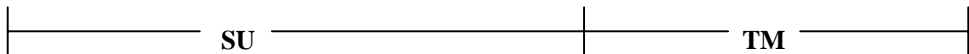

Supplement: MOESM2 [file 9607474]
